# Supplementary material for: Characterisation of the (Y1−xLax)2Ti2O7system by powder diffraction and nuclear magnetic resonance methods
Source: Royal Society of Chemistry journal article supplement (doi:10.1039/b608053g), 2006-01-01
Supplement: b608053g.pdf [file b608053g.pdf]

| Diffraction Type | Diffractometer      | Radiation Wavelength / Å | Data Collection Temperature / K | Nominal mole fraction of La in bulk | Nominal Bulk Composition                                            | Phase Composition | Pyrochlore lattice parameter / Å | Monoclinic 'a' lattice parameter / Å | Monoclinic 'b' lattice parameter / Å | Monoclinic 'c' lattice parameter / Å | Monoclinic 'β' lattice parameter / ° |
|------------------|---------------------|--------------------------|---------------------------------|-------------------------------------|---------------------------------------------------------------------|-------------------|----------------------------------|--------------------------------------|--------------------------------------|--------------------------------------|--------------------------------------|
| Neutron          | POLARIS, ISIS       | Variable (TOF)           | 298                             | 0                                   | Y <sub>2</sub> Ti <sub>2</sub> O <sub>7</sub>                       | Pyrochlore        | 10.09397(3)                      | -                                    | -                                    | -                                    | -                                    |
| X-ray            | Bruker d8 'Advance' | 1.54058                  | 298                             | 0.025                               | Y <sub>1.95</sub> La <sub>0.05</sub> Ti <sub>2</sub> O <sub>7</sub> | Pyrochlore        | 10.1020(1)                       | -                                    | -                                    | -                                    | -                                    |
| Neutron          | POLARIS, ISIS       | Variable (TOF)           | 298                             | 0.05                                | Y <sub>1.9</sub> La <sub>0.1</sub> Ti <sub>2</sub> O <sub>7</sub>   | Pyrochlore        | 10.11355(3)                      | -                                    | -                                    | -                                    | -                                    |
| X-ray            | Bruker d8 'Advance' | 1.54058                  | 298                             | 0.05                                | Y <sub>1.9</sub> La <sub>0.1</sub> Ti <sub>2</sub> O <sub>7</sub>   | Pyrochlore        | 10.1048(1)                       | -                                    | -                                    | -                                    | -                                    |
| X-ray            | Bruker d8 'Advance' | 1.54058                  | 298                             | 0.075                               | Y <sub>1.85</sub> La <sub>0.15</sub> Ti <sub>2</sub> O <sub>7</sub> | Pyrochlore        | 10.11037(4)                      | -                                    | -                                    | -                                    | -                                    |
| X-ray            | Bruker d8 'Advance' | 1.54058                  | 298                             | 0.1                                 | Y <sub>1.8</sub> La <sub>0.2</sub> Ti <sub>2</sub> O <sub>7</sub>   | Pyrochlore        | 10.10901(4)                      | -                                    | -                                    | -                                    | -                                    |
| X-ray            | Bruker d8 'Advance' | 1.54058                  | 298                             | 0.125                               | Y <sub>1.75</sub> La <sub>0.25</sub> Ti <sub>2</sub> O <sub>7</sub> | Pyrochlore        | 10.11306(6)                      | -                                    | -                                    | -                                    | -                                    |
| X-ray            | Bruker d8 'Advance' | 1.54058                  | 298                             | 0.15                                | Y <sub>1.7</sub> La <sub>0.3</sub> Ti <sub>2</sub> O <sub>7</sub>   | Pyrochlore        | 10.11981(6)                      | -                                    | -                                    | -                                    | -                                    |
| X-ray            | Bruker d8 'Advance' | 1.54058                  | 298                             | 0.175                               | Y <sub>1.65</sub> La <sub>0.35</sub> Ti <sub>2</sub> O <sub>7</sub> | Pyrochlore        | 10.12344(6)                      | -                                    | -                                    | -                                    | -                                    |
| Neutron          | POLARIS, ISIS       | Variable (TOF)           | 298                             | 0.2                                 | Y <sub>1.6</sub> La <sub>0.4</sub> Ti <sub>2</sub> O <sub>7</sub>   | P + M             | 10.13428(4)                      | 7.762(2)                             | 5.5118(8)                            | 13.002(5)                            | 98.7(1)                              |
| Neutron          | POLARIS, ISIS       | Variable (TOF)           | 298                             | 0.45                                | Y <sub>1.1</sub> La <sub>0.9</sub> Ti <sub>2</sub> O <sub>7</sub>   | P + M             | 10.13077(5)                      | 7.7592(3)                            | 5.5115(2)                            | 12.9953(6)                           | 98.62(1)                             |
| Neutron          | POLARIS, ISIS       | Variable (TOF)           | 298                             | 0.8                                 | Y <sub>0.4</sub> La <sub>1.6</sub> Ti <sub>2</sub> O <sub>7</sub>   | P + M             | 10.1347(8)                       | 7.7615(3)                            | 5.5133(2)                            | 13.0011(6)                           | 98.60(1)                             |
| X-ray            | Bruker d8 'Advance' | 1.54058                  | 298                             | 0.825                               | Y <sub>0.35</sub> La <sub>1.65</sub> Ti <sub>2</sub> O <sub>7</sub> | P + M             | 10.1315(4)                       | 7.7761(2)                            | 5.5219(1)                            | 13.0062(4)                           | 98.573(9)                            |
| X-ray            | Bruker d8 'Advance' | 1.54058                  | 298                             | 0.85                                | Y <sub>0.3</sub> La <sub>1.7</sub> Ti <sub>2</sub> O <sub>7</sub>   | P + M             | 10.132(1)                        | 7.7765(3)                            | 5.5224(2)                            | 13.0065(5)                           | 98.628(7)                            |
| X-ray            | Bruker d8 'Advance' | 1.54058                  | 298                             | 0.875                               | Y <sub>0.25</sub> La <sub>1.75</sub> Ti <sub>2</sub> O <sub>7</sub> | P + M             | 10.115(2)                        | 7.7756(4)                            | 5.5226(3)                            | 13.0015(7)                           | 98.586(9)                            |
| X-ray            | Bruker d8 'Advance' | 1.54058                  | 298                             | 0.9                                 | Y <sub>0.2</sub> La <sub>1.8</sub> Ti <sub>2</sub> O <sub>7</sub>   | Monoclinic        | -                                | 7.7821(4)                            | 5.5266(3)                            | 13.0058(7)                           | 98.62(1)                             |
| Neutron          | POLARIS, ISIS       | Variable (TOF)           | 298                             | 0.925                               | Y <sub>0.15</sub> La <sub>1.85</sub> Ti <sub>2</sub> O <sub>7</sub> | Monoclinic        | -                                | 7.7865(2)                            | 5.5308(2)                            | 13.0051(6)                           | 98.62(1)                             |
| X-ray            | Bruker d8 'Advance' | 1.54058                  | 298                             | 0.925                               | Y <sub>0.15</sub> La <sub>1.85</sub> Ti <sub>2</sub> O <sub>7</sub> | Monoclinic        | -                                | 7.7889(4)                            | 5.5319(3)                            | 13.0091(9)                           | 98.65(2)                             |
| X-ray            | Bruker d8 'Advance' | 1.54058                  | 298                             | 0.95                                | Y <sub>0.1</sub> La <sub>1.9</sub> Ti <sub>2</sub> O <sub>7</sub>   | Monoclinic        | -                                | 7.7953(2)                            | 5.5369(2)                            | 13.0111(5)                           | 98.62(1)                             |
| Neutron          | POLARIS, ISIS       | Variable (TOF)           | 298                             | 0.975                               | Y <sub>0.05</sub> La <sub>1.95</sub> Ti <sub>2</sub> O <sub>7</sub> | Monoclinic        | -                                | 7.8007(2)                            | 5.5403(1)                            | 13.0072(5)                           | 98.63(1)                             |
| X-ray            | Bruker d8 'Advance' | 1.54058                  | 298                             | 0.975                               | Y <sub>0.05</sub> Ti <sub>1.95</sub> Ti <sub>2</sub> O <sub>7</sub> | Monoclinic        | -                                | 7.8040(3)                            | 5.5423(2)                            | 13.0150(7)                           | 98.65(1)                             |
| Neutron          | POLARIS, ISIS       | Variable (TOF)           | 298                             | 1                                   | La <sub>2</sub> Ti <sub>2</sub> O <sub>7</sub>                      | Monoclinic        | -                                | 7.8090(1)                            | 5.54608(7)                           | 13.0143(2)                           | 98.658(4)                            |
